# Supplementary material for: The contribution of inflammatory astrocytes to BBB impairments in a brain-chip model of Parkinson’s disease
Source: PubMed Central journal article supplement (PMC10282096; doi:10.1038/s41467-023-39038-8), 2023-06-20
Supplement: 41467_2023_39038_MOESM5_ESM.pdf [file 41467_2023_39038_MOESM5_ESM.pdf]

## Reporting Summary

Nature Portfolio wishes to improve the reproducibility of the work that we publish. This form provides structure for consistency and transparency in reporting. For further information on Nature Portfolio policies, see our [Editorial Policies](#) and the [Editorial Policy Checklist](#).

### Statistics

For all statistical analyses, confirm that the following items are present in the figure legend, table legend, main text, or Methods section.

n/a Confirmed

- The exact sample size ( $n$ ) for each experimental group/condition, given as a discrete number and unit of measurement
- A statement on whether measurements were taken from distinct samples or whether the same sample was measured repeatedly
- The statistical test(s) used AND whether they are one- or two-sided  
*Only common tests should be described solely by name; describe more complex techniques in the Methods section.*
- A description of all covariates tested
- A description of any assumptions or corrections, such as tests of normality and adjustment for multiple comparisons
- A full description of the statistical parameters including central tendency (e.g. means) or other basic estimates (e.g. regression coefficient) AND variation (e.g. standard deviation) or associated estimates of uncertainty (e.g. confidence intervals)
- For null hypothesis testing, the test statistic (e.g.  $F$ ,  $t$ ,  $r$ ) with confidence intervals, effect sizes, degrees of freedom and  $P$  value noted  
*Give  $P$  values as exact values whenever suitable.*
- For Bayesian analysis, information on the choice of priors and Markov chain Monte Carlo settings
- For hierarchical and complex designs, identification of the appropriate level for tests and full reporting of outcomes
- Estimates of effect sizes (e.g. Cohen's  $d$ , Pearson's  $r$ ), indicating how they were calculated

*Our web collection on [statistics for biologists](#) contains articles on many of the points above.*

### Software and code

Policy information about [availability of computer code](#)

Data collection

Data were collected using GEN5 version 2.09, confocal images were collected using ZEN version 2.3.

Data analysis

RNA-seq data was analyzed using the following R packages: fastp v0.20.0, FastQC v0.11.8, MultiQC v1.8, Kallisto v0.46.2, FactoMineR v2.4, ggplot2 v3.3.3, RUVSeq v1.24.0, DESeq2 v1.30.1, tidyverse v2.0.0, and ComplexHeatmap v2.6.2. All R analysis were done in R v4.0.3. Gene ontology enrichment analysis was performed using the Database for Annotation, Visualization, and Integrated Discovery (DAVID v6.8, <https://david.ncifcrf.gov/>). GSEA analysis was performed using the broad institute GSEA-P tools. Other data were analyzed using GraphPac Prism version 8.0 (La Jolla, CA), ImageJ version 1.51n and 1.53T, myImageAnalysis Software version 1.1.

Custom code generated to analyze the RNA-seq data is available at: [https://github.com/ArnaudDroitLab/de\\_rus\\_jacquet\\_2023](https://github.com/ArnaudDroitLab/de_rus_jacquet_2023)

For manuscripts utilizing custom algorithms or software that are central to the research but not yet described in published literature, software must be made available to editors and reviewers. We strongly encourage code deposition in a community repository (e.g. GitHub). See the Nature Portfolio [guidelines for submitting code & software](#) for further information.

## Data

Policy information about [availability of data](#)

All manuscripts must include a [data availability statement](#). This statement should provide the following information, where applicable:

- Accession codes, unique identifiers, or web links for publicly available datasets
- A description of any restrictions on data availability
- For clinical datasets or third party data, please ensure that the statement adheres to our [policy](#)

RNA-seq datasets analyzed in this study were previously published and are publicly available, and they were obtained from GEO repository using accession numbers GSE116124 (<https://www.ncbi.nlm.nih.gov/geo/query/acc.cgi?acc=GSE116124>), GSE152768 (<https://www.ncbi.nlm.nih.gov/geo/query/acc.cgi?acc=GSE152768>), GSE120306 (<https://www.ncbi.nlm.nih.gov/geo/query/acc.cgi?acc=GSE120306>).

This study also accessed the following databases: Ensembl release 100 (<https://www.ensembl.org/info/website/archives/index.html?redirect=no>), the Human Transcription Factors database (<http://humantfs.cabr.utoronto.ca/>), the HumanTFDB portal (<http://bioinfo.life.hust.edu.cn/AnimalTFDB/>), the TF2DNA database ([https://www.fiserlab.org/tf2dna\\_db/](https://www.fiserlab.org/tf2dna_db/)), QuickGO (<https://www.ebi.ac.uk/QuickGO/>), GSEA (<https://www.gsea-msigdb.org/gsea/index.jsp>), Biocarta (<https://maayanlab.cloud/Harmonizome/dataset/Biocarta+Pathways>), KEGG (<https://www.genome.jp/kegg/>).

## Research involving human participants, their data, or biological material

Policy information about studies with [human participants or human data](#). See also policy information about [sex, gender \(identity/presentation\), and sexual orientation](#) and [race, ethnicity and racism](#).

### Reporting on sex and gender

Sex and gender were not considered as a variable in this study, however the iPSC lines used were generated from female donors. In addition, the postmortem tissue used in this work originated from donors of both sex. The postmortem work presented in Figure 8 is a small-scale study of 5 control and 5 PD donors, therefore we thought it would be best to show aggregated data into a single graph instead of disaggregating the data by sex. The abstract reflects the use of female iPSCs and both male/female human postmortem tissue. Table 1 and Supplementary Table 1 list the demographic information for the postmortem tissue and iPSC lines, respectively.

### Reporting on race, ethnicity, or other socially relevant groupings

This study does not report on race, ethnicity or other social groupings.

### Population characteristics

Population characteristic data is provided in Table 1 and include sex, disease status, age, postmortem interval and cause of death.

### Recruitment

Postmortem brain tissue used in Figure 8 was obtained from the CERVO brain bank in Quebec city, Canada.

### Ethics oversight

Ethical approval for the use of human tissue was received from Laval University's and CRCHUQ-UL institutional review board (i.e. CER), projet ID 2012-1138, A13-02-1138, SIRUL 107683.

Note that full information on the approval of the study protocol must also be provided in the manuscript.

## Field-specific reporting

Please select the one below that is the best fit for your research. If you are not sure, read the appropriate sections before making your selection.

- Life sciences     Behavioural & social sciences     Ecological, evolutionary & environmental sciences

For a reference copy of the document with all sections, see [nature.com/documents/nr-reporting-summary-flat.pdf](https://www.nature.com/documents/nr-reporting-summary-flat.pdf)

## Life sciences study design

All studies must disclose on these points even when the disclosure is negative.

### Sample size

#### In vitro experiments:

A minimum of three biological replicates were independently collected, and the details of the number of replicates and sample size are provided in the figure legends. No statistical methods were used to predetermine the number of biological replicates and sample size. A minimum of three independent biological replicates were performed to evaluate reproducibility, as done in previous work (<https://elifesciences.org/articles/73062>). Data was collected using isogenic and non-isogenic iPSC pairs, and these pairs are explicitly identified in the figures and figure legends.

#### Human postmortem study:

Brain sections originating from 5 control and 5 persons with Parkinson's disease were used for this study. No statistical methods were used to predetermine the sample size, we established the sample size based on tissue availability.

### Data exclusions

Outliers were identified using Grubbs' test with an alpha value set at 0.05 and removed from analysis. This criteria is pre-established because of the inherent variability of the BBB-chip model. This information is included in the figure legends of the corrected data.

|               |                                                                                                                                                                                                                                                                                                                                                                                                                                                                                                                                                                                      |
|---------------|--------------------------------------------------------------------------------------------------------------------------------------------------------------------------------------------------------------------------------------------------------------------------------------------------------------------------------------------------------------------------------------------------------------------------------------------------------------------------------------------------------------------------------------------------------------------------------------|
| Replication   | In vitro experiments were validated across a minimum of three independent biological replicates. Findings were replicated across several iPSC pairs generated from an independent donors. We did not observe discrepancies in the results collected.<br><br>Postmortem human experiments were performed on tissue donated by 5 different control and 5 different PD donors.                                                                                                                                                                                                          |
| Randomization | For each cell type, iPSCs were differentiated into multiple independent batches, and cryopreserved for future use. Cells were then randomly assigned to the experimental groups.                                                                                                                                                                                                                                                                                                                                                                                                     |
| Blinding      | Experiments at-risk for bias (analysis of BBB-chips):<br>The investigators were blinded to group allocation during data analysis via the assignment of sample IDs (BBB-chips were assigned a Beacon ID at the time the images were taken, which de-identified the images).<br><br>Experiments at-risk for bias (human postmortem analysis):<br>The investigators were blinded to group allocation during data analysis via the use of sample IDs.<br><br>Other experiments were not evaluated using subjective measures, and the investigators were not blinded to group allocation. |

## Reporting for specific materials, systems and methods

We require information from authors about some types of materials, experimental systems and methods used in many studies. Here, indicate whether each material, system or method listed is relevant to your study. If you are not sure if a list item applies to your research, read the appropriate section before selecting a response.

### Materials & experimental systems

| n/a                                 | Included in the study                                     |
|-------------------------------------|-----------------------------------------------------------|
| <input type="checkbox"/>            | <input checked="" type="checkbox"/> Antibodies            |
| <input type="checkbox"/>            | <input checked="" type="checkbox"/> Eukaryotic cell lines |
| <input checked="" type="checkbox"/> | <input type="checkbox"/> Palaeontology and archaeology    |
| <input checked="" type="checkbox"/> | <input type="checkbox"/> Animals and other organisms      |
| <input checked="" type="checkbox"/> | <input type="checkbox"/> Clinical data                    |
| <input checked="" type="checkbox"/> | <input type="checkbox"/> Dual use research of concern     |
| <input checked="" type="checkbox"/> | <input type="checkbox"/> Plants                           |

### Methods

| n/a                                 | Included in the study                           |
|-------------------------------------|-------------------------------------------------|
| <input checked="" type="checkbox"/> | <input type="checkbox"/> ChIP-seq               |
| <input checked="" type="checkbox"/> | <input type="checkbox"/> Flow cytometry         |
| <input checked="" type="checkbox"/> | <input type="checkbox"/> MRI-based neuroimaging |

## Antibodies

Antibodies used

All antibody information is detailed in supplementary table 2 and below. Information about dilution for each antibody is provided in the manuscript.

#### Antibodies

anti-AKT1/2/3 Cell Signaling Technologies sc8312  
 anti-Alpha-smooth muscle actin Sigma C6198  
 anti-CD31 eBiosciences 14-0311-81  
 anti-claudin 5 Thermo Fisher Scientific 35-2500  
 anti-GAPDH Cell Signaling Technologies 2118  
 anti-GAPDH Applied Biological Materials G041  
 anti-GFAP BD Biosciences 556328  
 anti-GLUT1 Novus Biologicals NBP2-75785  
 anti-p38 MAPK Cell Signaling Technologies 8690  
 anti-p44/42 MAPK Cell Signaling Technologies 4695  
 anti-occludin Invitrogen 71-1500  
 anti-phospho-AKT (Ser473) Cell Signaling Technologies 9271  
 anti-phospho-p38 MAPK (Thr180/Tyr182) Cell Signaling Technologies 4511  
 anti-phospho-p44/42 MAPK (Thr202/Tyr204) Cell Signaling Technologies 4370  
 anti-VE-cadherin (for IF) R&D Systems AF938  
 anti-VE-cadherin (for western blot) Abcam ab33168  
 anti-ZO1 Invitrogen 61-7300  
 anti-laminin Dako Agilent Z0097  
 Anti-tyrosine hydroxylase Millipore Sigma MAB318  
 Goat anti-mouse Alexa Fluor 488 Invitrogen A11029  
 Donkey anti-mouse Alexa Fluor 555 Invitrogen A31570  
 Goat anti-rabbit Alexa Fluor 488 Invitrogen A11034  
 Donkey anti-rabbit Alexa Fluor 555 Invitrogen A31572  
 Donkey anti-rabbit Alexa Fluor 546 Invitrogen A10040  
 Donkey anti-goat Alexa Fluor 488 Invitrogen A11055

HRP-goat anti-rabbit Jackson ImmunoResearch 111-035-144  
HRP-goat anti-mouse Jackson ImmunoResearch 115-035-166

## Validation

Antibodies were selected based on previous utilization in published studies and reactivity with human proteins, since all our experiments were performed using human cells or tissue. Furthermore, we relied on validation statements on the manufacturer's website and customer reviews. BenchSci served as an additional resource to select antibodies for our study. In addition, we validated antibodies in-house by verifying proper cellular localization (immunofluorescence) or molecular weight (western blot).

anti-AKT1/2/3 Santa Cruz Biotechnology sc8312 Used in 524 publications (source: BenchSci)  
anti-Alpha-smooth muscle actin Sigma C6198 Used in 402 publications (source: BenchSci)  
anti-CD31 eBiosciences 14-0311-81 Used in 168 publications (source: BenchSci)  
anti-claudin 5 Thermo Fisher Scientific 35-2500 Used in 206 publications (source: BenchSci)  
anti-GAPDH Cell Signaling Technologies 2118 Used in 2.5K publications (source: BenchSci)  
anti-GAPDH Applied Biological Materials G041 Used in 12 publications (source: BenchSci)  
anti-GFAP BD Biosciences 556328 Used in 15 publications (source: BenchSci)  
anti-GLUT1 Novus Biologicals NBP2-75785 Validation provided on the Manufacturer's website  
anti-p38 MAPK Cell Signaling Technologies 8690 Used in 763 publications (source: BenchSci)  
anti-p44/42 MAPK Cell Signaling Technologies 4695 Used in 2.1K publications (source: BenchSci)  
anti-occludin Invitrogen 71-1500 Used in 383 publications (source: BenchSci)  
anti-phospho-AKT (Ser473) Cell Signaling Technologies 9271 Used in 3.2K publications (source: BenchSci)  
anti-phospho-p38 MAPK (Thr180/Tyr182) Cell Signaling Technologies 4511 Used in 766 publications (source: BenchSci)  
anti-phospho-p44/42 MAPK (Thr202/Tyr204) Cell Signaling Technologies 4370 Used in 2K publications (source: BenchSci)  
anti-VE-cadherin (for IF) R&D Systems AF938 Used in 20 publications (source: BenchSci)  
anti-VE-cadherin (for western blot) Abcam ab33168 Used in 271 publications (source: BenchSci)  
anti-ZO1 Invitrogen 61-7300 Used in 843 publications (source: BenchSci)  
anti-laminin Dako Agilent Z0097 Used in 80 publications (source: BenchSci)  
anti-tyrosine hydroxylase Millipore Sigma MAB318 Used in 326 publications (source: BenchSci)

## Eukaryotic cell lines

Policy information about [cell lines and Sex and Gender in Research](#)

## Cell line source(s)

Isogenic LRRK2 G2019S iPSCs provided by Prof. Dr. Thomas Gasser (Universitätsklinikum Tübingen) and Prof. Dr. Hans R. Schöler (Max-Planck Institute) (Reinhardt et al., 2013)

Non-isogenic LRRK2 G2019S iPSCs provided by Dr. Randall T. Moon (Howard Hughes Medical Institute/University of Washington) (de Rus Jacquet, 2021)

Non-isogenic LRRK2 G2019S iPSCs provided by the NINDS repository ND40018, ND38554.  
Primary human brain vascular pericytes purchased at ScienCell Research Laboratories (catalog number 1200)

## Authentication

LRRK2 G2019S mutants were genotyped as described in de Rus Jacquet et al. eLife 10:e73062

## Mycoplasma contamination

Lines originating from the Coriell repository were controlled for absence of mycoplasma contamination.

Commonly misidentified lines  
(See [ICLAC](#) register)

This study did not use commonly misidentified lines.
